# Supplementary material for: Food-Based Dietary Guidelines for Infants in Latin America and the Caribbean: A Systematic Review
Source: MDPI journal article supplement (doi:10.3390/nu16081233), 2024-04-21
Supplement: s1 [file s1]

Supplementary Material Table S1: Original Score Scale based on Agree II for Overall assessment of FBDG.

### Agree II formula:

#### Example:

If 4 appraisers give the following scores for Domain 1 (Scope & Purpose):

|              | Item 1    | Item 2    | Item 3    | Total     |
|--------------|-----------|-----------|-----------|-----------|
| Appraiser 1  | 5         | 6         | 6         | 17        |
| Appraiser 2  | 6         | 6         | 7         | 19        |
| Appraiser 3  | 2         | 4         | 3         | 9         |
| Appraiser 4  | 3         | 3         | 2         | 8         |
| <b>Total</b> | <b>16</b> | <b>19</b> | <b>18</b> | <b>53</b> |

Maximum possible score = 7 (strongly agree) x 3 (items) x 4 (appraisers) = 84

Minimum possible score = 1 (strongly disagree) x 3 (items) x 4 (appraisers) = 12

The scaled domain score will be:

$$\frac{\text{Obtained score} - \text{Minimum possible score}}{\text{Maximum possible score} - \text{Minimum possible score}}$$

$$\frac{53 - 12}{84 - 12} \times 100 = \frac{41}{72} \times 100 = 0.5694 \times 100 = 57 \%$$

*If items are not included, appropriate modifications to the calculations of maximum and minimum possible scores are required.*

For each domain it can rate 100% percent as maximum, so we considered 600% as maximum rate for Overall Assessment and added all the domain scores for each Guide, resulting in a score that varied from 0% to 600%, with ranges of 85% (for the 7 items of Likert Scale,  $600/7=85$ ). This way, the overall score classified the Guide in one of the 7 categories. All of the calculations were made in Excel.
