# Supplementary material for: Food-Based Dietary Guidelines for Infants in Latin America and the Caribbean: A Systematic Review
Source: MDPI journal article supplement (doi:10.3390/nu16081233), 2024-04-21
Supplement: s1 [file s1]

**Supplementary Material Table S2: LIST OF RESEARCHED ASSOCIATIONS AND INSTITUTIONS (GRAY LITERATURE)**

| Institution                                                    | Link                                                                                                                                                                                                                                                                |
|----------------------------------------------------------------|---------------------------------------------------------------------------------------------------------------------------------------------------------------------------------------------------------------------------------------------------------------------|
| Ministerio de Salud (Gobierno de Chile)                        | <a href="https://www.minsal.cl/politicas-publicas-en-alimentacion-y-nutricion/">https://www.minsal.cl/politicas-publicas-en-alimentacion-y-nutricion/</a>                                                                                                           |
| Guao (biblioteca del gobierno de Venezuela)                    | <a href="https://www.guao.org/biblioteca/alimentacion-del-nino-y-la-nina-preescolar-y-escolar">https://www.guao.org/biblioteca/alimentacion del nino y la nina preescolar y escolar</a>                                                                             |
| INAN (Instituto Nacional de Alimentación y Nutrición)          | <a href="https://www.inan.gov.py/site/">https://www.inan.gov.py/site/</a>                                                                                                                                                                                           |
| Ministerio de Salud Peruano                                    | <a href="https://www.gob.pe/institucion/minsa/informes-publicaciones/314037-guias-alimentarias-para-la-poblacion-peruana">https://www.gob.pe/institucion/minsa/informes-publicaciones/314037-guias-alimentarias-para-la-poblacion-peruana</a>                       |
| Ministerio de Salud y Deportes de Bolivia                      | <a href="https://www.minsalud.gob.bo/">https://www.minsalud.gob.bo/</a>                                                                                                                                                                                             |
| Instituto Colombiano de Bienestar Familiar ICBF                | <a href="https://www.icbf.gov.co/guias-alimentarias-basadas-en-alimentos-para-mujeres-gestantes-madres-en-periodo-de-lactancia-y-2">https://www.icbf.gov.co/guias-alimentarias-basadas-en-alimentos-para-mujeres-gestantes-madres-en-periodo-de-lactancia-y-2</a>   |
| Ministerio de Desarrollo Social del Uruguay                    | <a href="https://www.gub.uy/buscar?search_api_fulltext=u%C3%ADa+de+alimentaci%C3%B3n+complementaria+para+ni%C3%B1os+de+entre+6+y+24">https://www.gub.uy/buscar?search_api_fulltext=u%C3%ADa+de+alimentaci%C3%B3n+complementaria+para+ni%C3%B1os+de+entre+6+y+24</a> |
| Secretaría de Salud (Gobierno de México)                       | <a href="https://www.gob.mx/promosalud/documentos/guias-alimentarias-para-la-poblacion-mexicana?state=published">https://www.gob.mx/promosalud/documentos/guias-alimentarias-para-la-poblacion-mexicana?state=published</a>                                         |
| Ministerio de Salud Pública (Gobierno de República Dominicana) | <a href="https://repositorio.msp.gob.do/handle/123456789/1249">https://repositorio.msp.gob.do/handle/123456789/1249</a>                                                                                                                                             |
| Instituto de Nutrición de                                      | <a href="http://www.sintet.net/biblioteca/guia-alimentaria-para-poblacion-guatemalteca-menor-de-2-anos">http://www.sintet.net/biblioteca/guia-alimentaria-para-poblacion-guatemalteca-menor-de-2-anos</a>                                                           |

**Supplementary Material Table S2: LIST OF RESEARCHED ASSOCIATIONS AND INSTITUTIONS (GRAY LITERATURE)**

|                                                                                              |                                                                                                                                                                                                                                                                                                                                                           |
|----------------------------------------------------------------------------------------------|-----------------------------------------------------------------------------------------------------------------------------------------------------------------------------------------------------------------------------------------------------------------------------------------------------------------------------------------------------------|
| Centro América y Panamá (INCAP)/Ministerio de Salud Pública y Asistencia Social de Guatemala |                                                                                                                                                                                                                                                                                                                                                           |
| Departamento de Salud Nutricional del Ministerio de Salud (MINSA) de la República de Panamá  | <a href="https://www.fao.org/3/CA1017ES/ca1017es.pdf">https://www.fao.org/3/CA1017ES/ca1017es.pdf</a>                                                                                                                                                                                                                                                     |
| Ministerio de Salud y Ambiente de la Nación (Gobierno de Argentina)                          | <a href="https://www.minsalud.gob.bo/images/Libros/DGPS/PDS/p345_g_dgps_uan_GUIA_ALIMENTARIA_PARA_LA_MUJER_DURANTE_EL_PERIODO_DE_EMBARAZO_Y_LACTANCIA.pdf">https://www.minsalud.gob.bo/images/Libros/DGPS/PDS/p345_g_dgps_uan_GUIA_ALIMENTARIA PARA LA MUJER DURANTE EL PERIODO DE EMBARAZO Y LACTANCIA.pdf</a>                                           |
| Ministério da Saúde (Governo Federal do Brasil)                                              | <a href="https://www.gov.br/saude/pt-br/assuntos/saude-brasil/eu-queiro-me-alimentar-melhor/Documentos/pdf/guia-alimentar-para-criancas-brasileiras-menores-de-2-anos.pdf/view">https://www.gov.br/saude/pt-br/assuntos/saude-brasil/eu-queiro-me-alimentar-melhor/Documentos/pdf/guia-alimentar-para-criancas-brasileiras-menores-de-2-anos.pdf/view</a> |
| Ministerio de Salud Pública (Gobierno de Ecuador)                                            | <a href="https://www.salud.gob.ec/wp-content/uploads/2019/07/4_alimentacion_ni%C3%B1o_menor_2a%C3%B1os.pdf">https://www.salud.gob.ec/wp-content/uploads/2019/07/4_alimentacion_ni%C3%B1o_menor_2a%C3%B1os.pdf</a>                                                                                                                                         |
| Ministerie van Volksgezondheid (Republiek Suriname)                                          | <a href="https://gov.sr/ministeries/ministerie-van-volksgezondheid/">https://gov.sr/ministeries/ministerie-van-volksgezondheid/</a>                                                                                                                                                                                                                       |
| Ministry of Health Guyana                                                                    | <a href="https://www.health.gov.gy/">https://www.health.gov.gy/</a>                                                                                                                                                                                                                                                                                       |
| Ministry of Health and                                                                       | <a href="https://www.health.gov.bz/">https://www.health.gov.bz/</a>                                                                                                                                                                                                                                                                                       |

**Supplementary Material Table S2: LIST OF RESEARCHED ASSOCIATIONS AND INSTITUTIONS (GRAY LITERATURE)**

|                                                                                    |                                                                                                                                         |
|------------------------------------------------------------------------------------|-----------------------------------------------------------------------------------------------------------------------------------------|
| Wellness Belize                                                                    |                                                                                                                                         |
| Ministerio de Salud (Gobierno de Costa Rica)                                       | <a href="https://www.ministeriodesalud.go.cr/">https://www.ministeriodesalud.go.cr/</a>                                                 |
| Ministerio de Salud (Gobierno de El Salvador)                                      | <a href="https://www.salud.gob.sv/">https://www.salud.gob.sv/</a>                                                                       |
| Secretaria de Salud (Gobierno de la República de Honduras)                         | <a href="https://www.salud.gob.hn/sshome/index.php">https://www.salud.gob.hn/sshome/index.php</a>                                       |
| Ministerio de Salud (Gobierno de Reconiliación y Unidad Nacional de Nicaragua)     | <a href="https://www.minsa.gob.ni/">https://www.minsa.gob.ni/</a>                                                                       |
| Ministry of Health, Wellness and the Environment (Government of Antigua e Barbuda) | <a href="https://health.gov.ag/#">https://health.gov.ag/#</a>                                                                           |
| Ministry of Health (The Government of The Bahamas)                                 | <a href="https://www.bahamas.gov.bs/health/">https://www.bahamas.gov.bs/health/</a>                                                     |
| Ministry of Health and Wellness (Government of Barbados)                           | <a href="https://www.health.gov.bb/">https://www.health.gov.bb/</a>                                                                     |
| Ministerio de Salud Pública                                                        | <a href="https://salud.msp.gob.cu/?s=guia+alimentaria+para+ni%C3%B1os">https://salud.msp.gob.cu/?s=guia+alimentaria+para+ni%C3%B1os</a> |

**Supplementary Material Table S2: LIST OF RESEARCHED ASSOCIATIONS AND INSTITUTIONS (GRAY LITERATURE)**

|                                                                              |                                                                                                                                                             |
|------------------------------------------------------------------------------|-------------------------------------------------------------------------------------------------------------------------------------------------------------|
| (República de Cuba)                                                          |                                                                                                                                                             |
| Ministry of Health, Wellness and Social Services (Government of Dominica)    | <a href="https://dominica.gov.dm/ministries/health-wellness-and-social-services">https://dominica.gov.dm/ministries/health-wellness-and-social-services</a> |
| Ministerio de Sanidad (Ayuntamiento de Granada)                              | <a href="https://www.granada.org/">https://www.granada.org/</a>                                                                                             |
| Ministère de la Santé Publique et de la Population (République d’Haïti)      | <a href="https://www.mspp.gouv.ht/">https://www.mspp.gouv.ht/</a>                                                                                           |
| Ministry of Health and Wellness (Government of Jamaica)                      | <a href="https://www.moh.gov.jm/">https://www.moh.gov.jm/</a>                                                                                               |
| Ministry of Health, Wellness and Elderly Affairs (Government of Saint Lucia) | <a href="https://health.govt.lc/">https://health.govt.lc/</a>                                                                                               |
| Ministry of Health and Social Security (Government of Saint Kitts and Nevis) | <a href="https://www.gov.kn/">https://www.gov.kn/</a>                                                                                                       |
| Ministry of Health (Government of the Republic of Trinidad)                  | <a href="https://health.gov.tt/">https://health.gov.tt/</a>                                                                                                 |

**Supplementary Material Table S2: LIST OF RESEARCHED ASSOCIATIONS AND INSTITUTIONS (GRAY LITERATURE)**

|             |  |
|-------------|--|
| and Tobago) |  |
|-------------|--|

**REFERENCES OF ACESSED PORTALS**

FAO Food-Based Dietary Guidelines Available online: <http://www.fao.org/nutrition/education/food-dietary-guidelines/home/en/> (accessed on 25 October 2023).

Guías Alimentarias menores 2 años Available online: <https://www.icbf.gov.co/nutricion/guias-alimentarias-menores-2-anos> (accessed on 25 October 2023).

Banco de Recursos de Comunicación Del Ministerio de Salud de La Nación | Guía de Alimentación Infantil Available online: <https://bancos.salud.gob.ar/recurso/guia-de-alimentacion-infantil> (accessed on 25 October 2023).

Políticas Públicas En Alimentación y Nutrición Available online: <https://www.minsal.cl/politicas-publicas-en-alimentacion-y-nutricion/> (accessed on 25 October 2023).

Alimentación Del Niño y La Niña Preescolar y Escolar | Guao Available online: [https://www.guao.org/biblioteca/alimentacion\\_del\\_nino\\_y\\_la\\_nina\\_preescolar\\_y\\_escolar](https://www.guao.org/biblioteca/alimentacion_del_nino_y_la_nina_preescolar_y_escolar) (accessed on 27 October 2023).

INAN – Instituto Nacional de Alimentación y Nutrición.

Guías alimentarias para la población peruana Available online: <https://www.gob.pe/institucion/minsa/informes-publicaciones/314037-guias-alimentarias-para-la-poblacion-peruana> (accessed on 27 October 2023).

Bolivia (Plurinational State Of) Available online: <http://www.fao.org/nutrition/education/food-dietary-guidelines/regions/bolivia-plurinational-state-of/en/> (accessed on 25 October 2023).

Ministerio de Desarrollo Social Guía Alimentaria Para La Población Uruguay Available online: [https://www.gub.uy/buscar?search\\_api\\_fulltext=u%C3%ADa+de+alimentaci%C3%B3n+complementaria+para+ni%C3%B1os+de+entre+6+y+24](https://www.gub.uy/buscar?search_api_fulltext=u%C3%ADa+de+alimentaci%C3%B3n+complementaria+para+ni%C3%B1os+de+entre+6+y+24) (accessed on 27 October 2023).

salud, H. de Guías alimentarias para la población mexicana Available online: <http://www.gob.mx/promosalud/documentos/guias-alimentarias-para-la-poblacion-mexicana?state=published> (accessed on 25 October 2023).
